# Supplementary material for: On the stability and chemorheology of a urea choline chloride deep-eutectic solvent as an internal phase in acrylic high internal phase emulsions
Source: Royal Society of Chemistry journal article supplement (doi:10.1039/c6ra18931h), 2016-01-01

## Supporting information

### On the Stability and Chemorheology of Urea Choline Chloride Deep-Eutectic Solvent as an Internal Phase for Acrylic High Internal Phase Emulsions.

*Carranza A., Song K., Soltero-Martínez J. F. A., Wu Q., Pojman J. A., and Mota-Morales J. D. \**

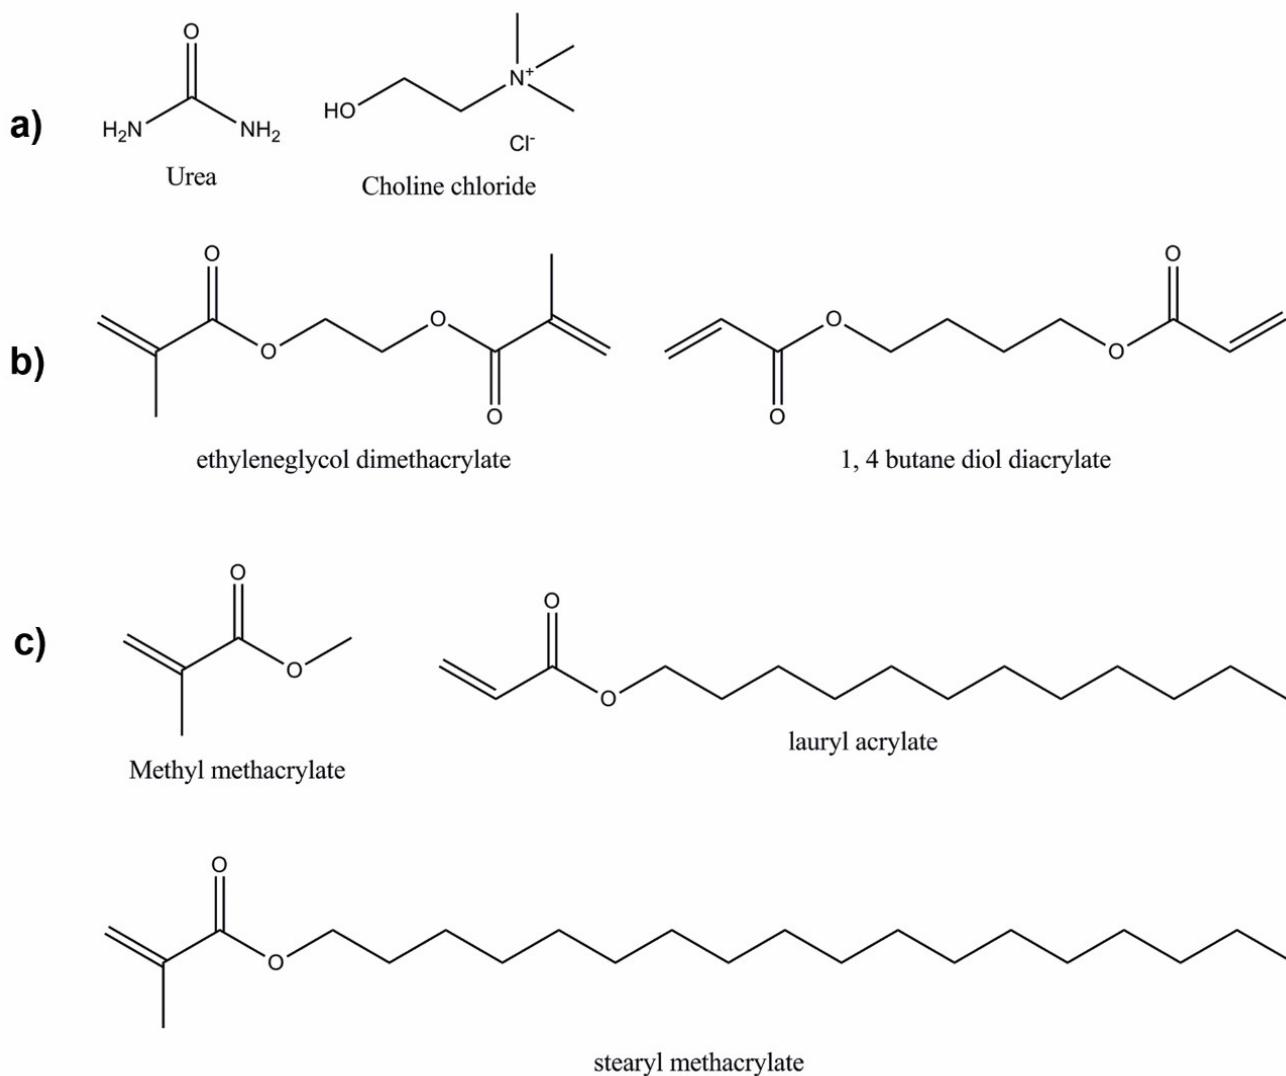

**Figure S1.** Structures of reagents: a) DES components b) cross-linkers and c) monomers used

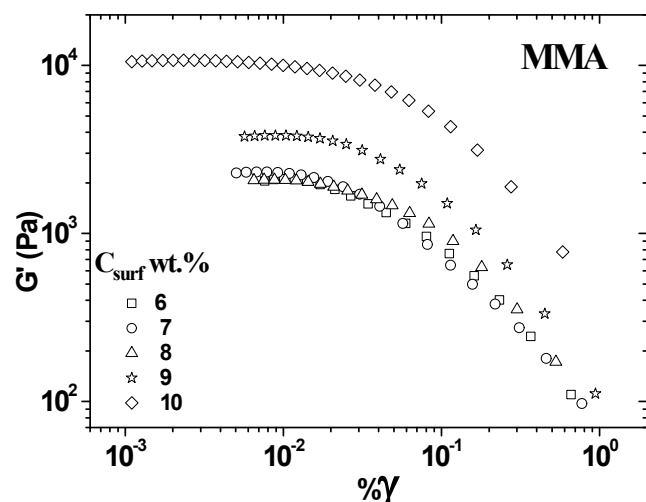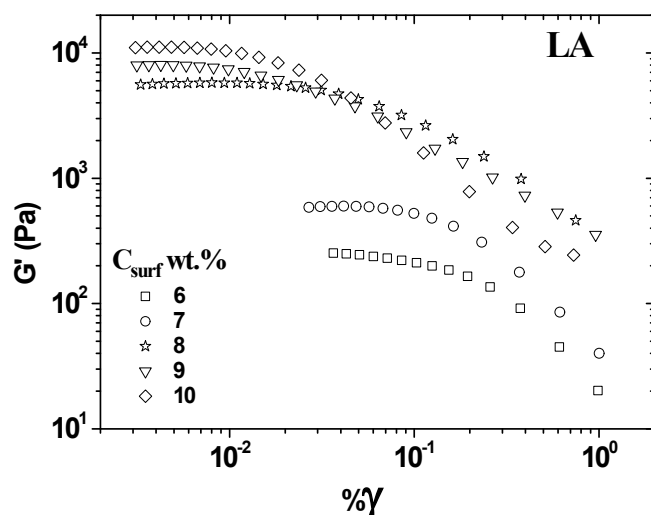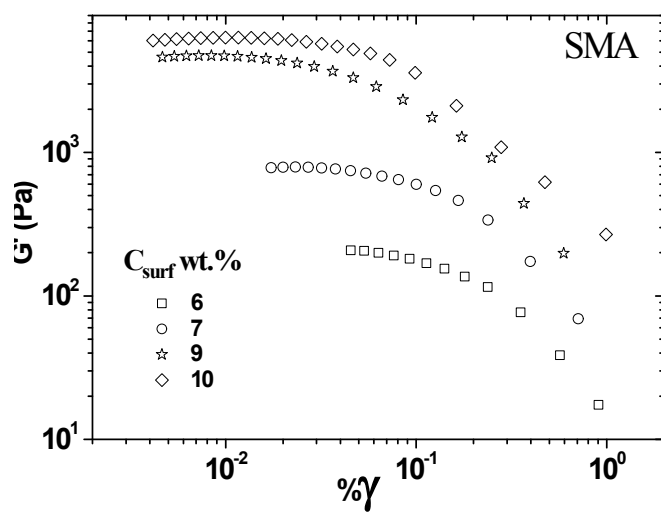

**Figure S2.** Storage Modulus vs. %Strain a) methyl methacrylate b) lauryl acrylate and c) stearyl methacrylate.

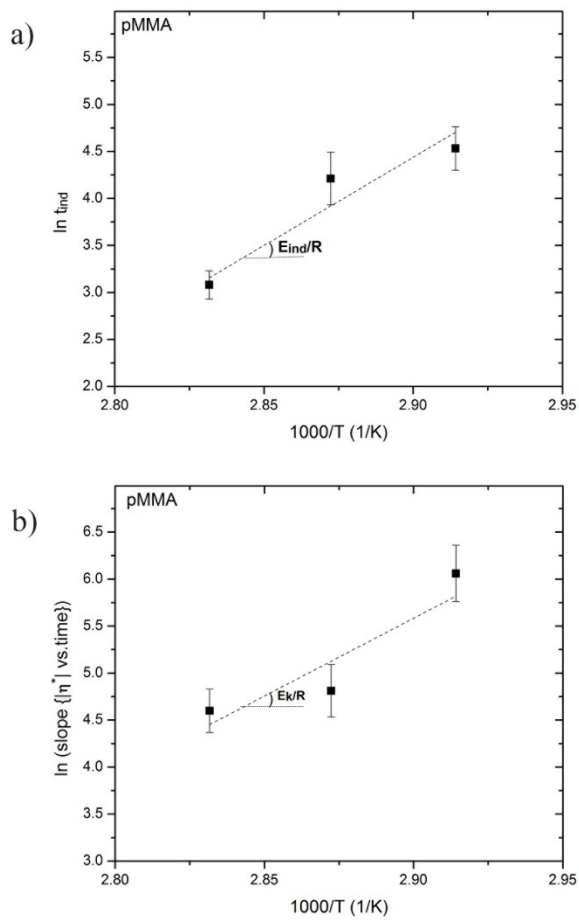

**Figure S3.** (a) Temperature effects on induction time,  $t_{ind}$ , for pMMA where the slope can be used to estimate the induction activation energy,  $E_{ind}$ . (b) Using an Arrhenius relationship, the reaction activation energy,  $E_k$ , for pMMA can be estimated from the slope of complex viscosity versus time and its temperature dependence.

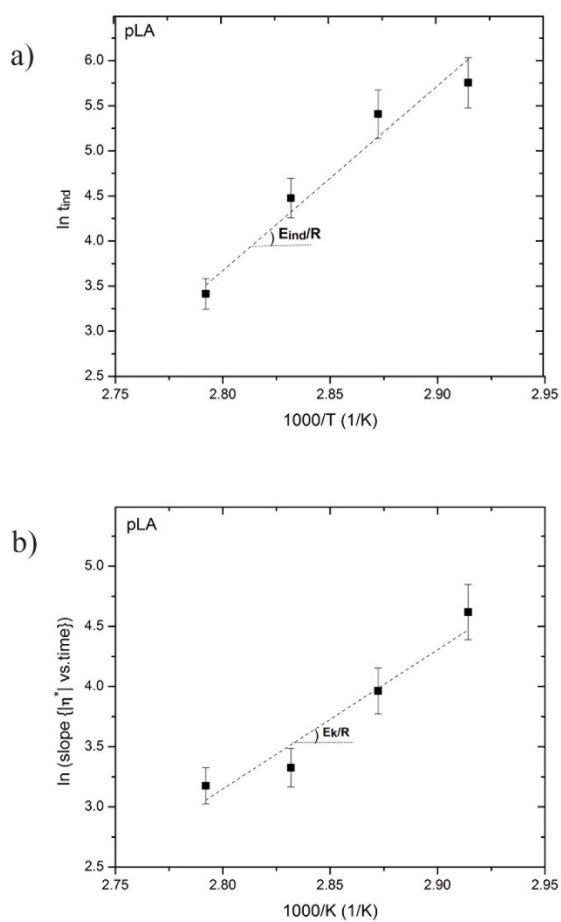

**Figure S4.** (a) Temperature effects on induction time,  $t_{ind}$ , for pLA where the slope can be used to estimate the induction activation energy,  $E_{ind}$ . (b) Using an Arrhenius relationship, the reaction activation energy,  $E_k$ , for pLA can be estimated from the slope of complex viscosity versus time and its temperature dependence.

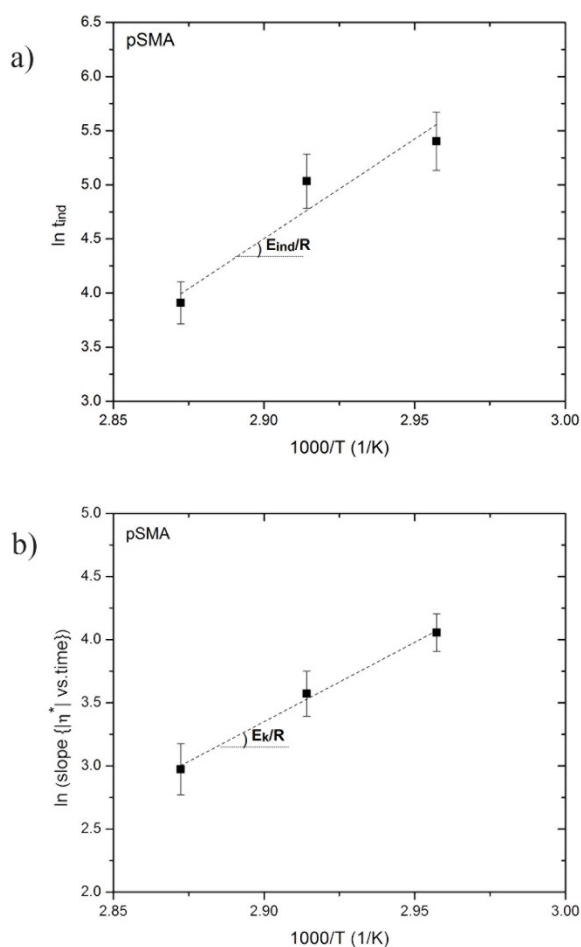

**Figure S5.** (a) Temperature effects on induction time,  $t_{ind}$ , for pSMA where the slope can be used to estimate the induction activation energy,  $E_{ind}$ . (b) Using an Arrhenius relationship, the reaction activation energy,  $E_k$ , for pSMA can be estimated from the slope of complex viscosity versus time and its temperature dependence.

**Scheme S1.** Critical extent of reaction for theoretical gel point determination.

$$(1) r = \frac{N_m f_m}{N_c f_c}$$

$$(2) f_{w,m} = \frac{\sum f_{m_i}^2 N_{m_i}}{\sum f_{m_i} N_{m_i}}$$

$$(3) f_{w,c} = \frac{\sum f_{c_j}^2 N_{c_j}}{\sum f_{c_j} N_{c_j}}$$

$$(4) \quad P_c = \frac{1}{[r(f_{w,m} - 1)(f_{w,c} - 1)]^{1/2}}$$

Where:

$r$  = ratio of monomer groups to cross-linker groups

$N_m$  = number of monomer moles

$N_c$  = number of cross-linker moles

$f_m$  = monomer functionality

$f_c$  = cross-linker functionality

$f_{w,m}$  = monomer weight-average functionalities

$f_{w,c}$  = cross-linker weight-average functionalities

$P_c$  = the extent of reaction at gel point

**Table S1** Poly(HIPE) summary of equivalent weight, functionality, and extent of reaction at gel point.

| Poly(HIPE) | Monomer $M_w$<br>(g mol <sup>-1</sup> ) | Monomer<br>$f_{avg}$ | Cross-linker<br>$M_w$ (gmol <sup>-1</sup> ) | Cross-linker<br>$f_{avg}$ | Equivalent<br>Weight | $r$  | $f_{w,m}$ | $f_{w,c}$ | $P_c$ |
|------------|-----------------------------------------|----------------------|---------------------------------------------|---------------------------|----------------------|------|-----------|-----------|-------|
| pMMA       | 100.1                                   | 1                    | 198.2                                       | 2                         | 99.4                 | 0.99 | 1         | 2         | 0.71  |
| pLA        | 240.4                                   | 1                    | 198.2                                       | 2                         | 146.2                | 1.0  | 1         | 2         | 0.71  |
| pSMA       | 338.6                                   | 1                    | 198.2                                       | 2                         | 178.9                | 1.0  | 1         | 2         | 0.71  |

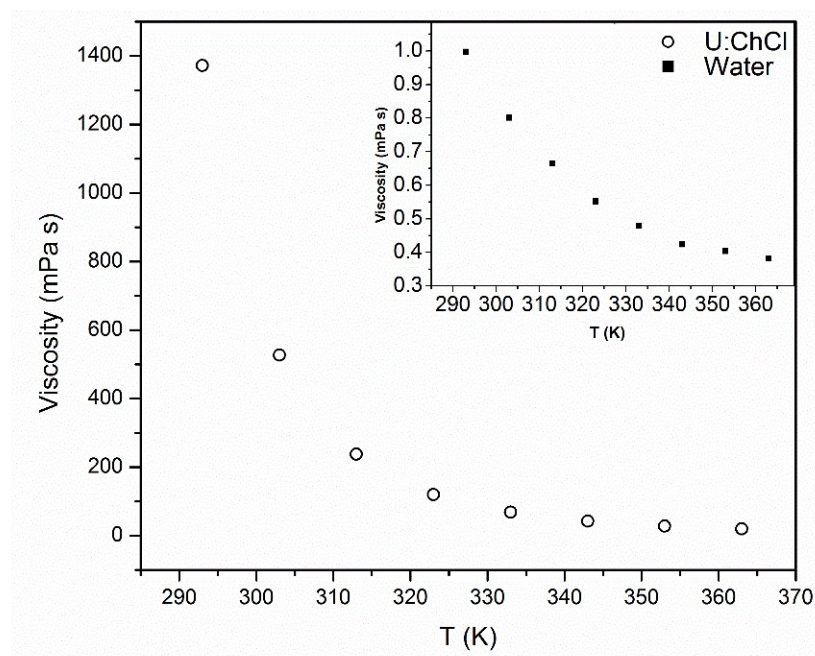

**Figure S6** Change in viscosity as a function temperature for urea choline chloride (U:CHCl) DES and water (inset).

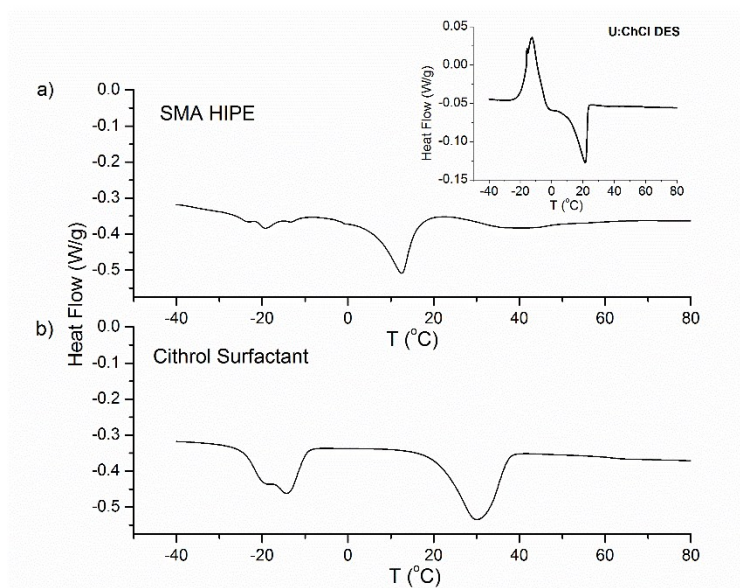

**Figure S7** a) Characteristic HIPE DSC curve, (b) Cithrol Surfactant, and urea choline chloride DES (inset).

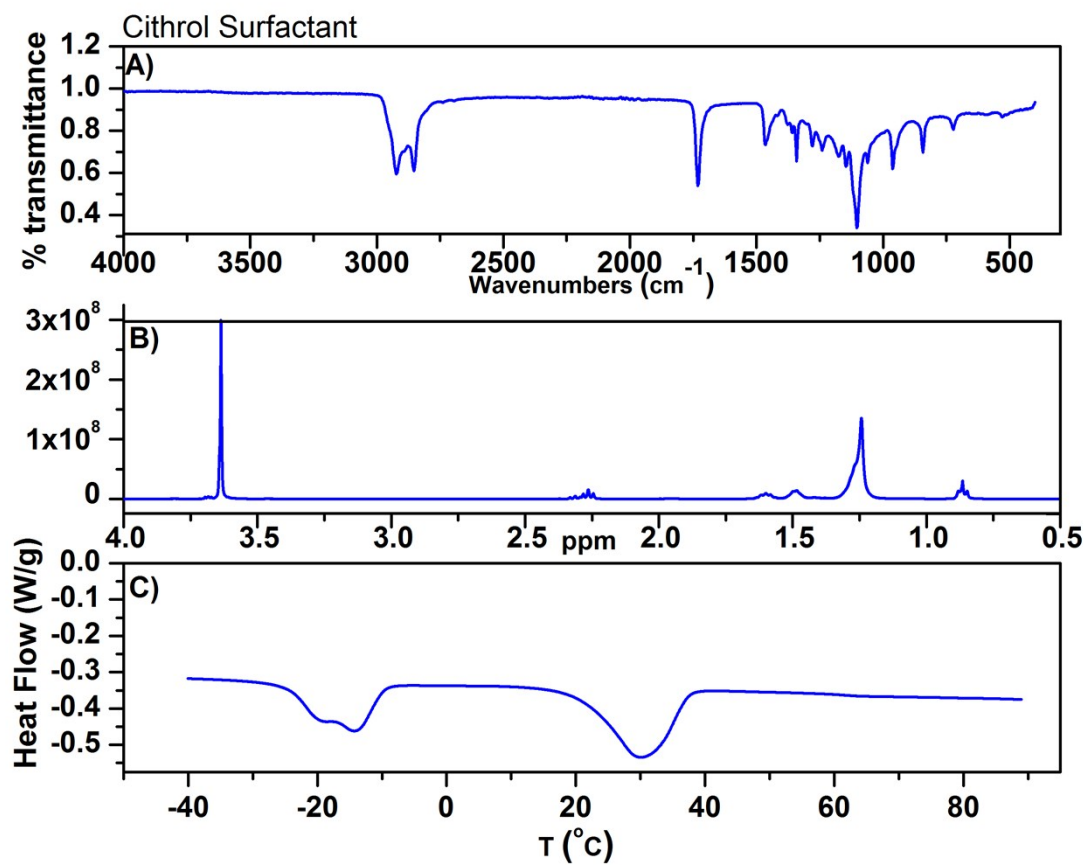

**Figure S8.** Cithrol Surfactant characterization by A) FTIR, B) NMR, and C) DSC

**Table S2.** Average drop dispersity, pore size distribution, and pore window size distribution for MMA, SMA, and LA based HIPEs and poly(HIPEs)

| Sample | Drop Dispersity | Pore Size Distribution | Pore Window Size Distribution |
|--------|-----------------|------------------------|-------------------------------|
| MMA    | 0.36            | 0.38                   | 0.38                          |
| SMA    | 0.25            | 0.20                   | 0.33                          |
| LA     | 0.49            | 0.33                   | 0.43                          |

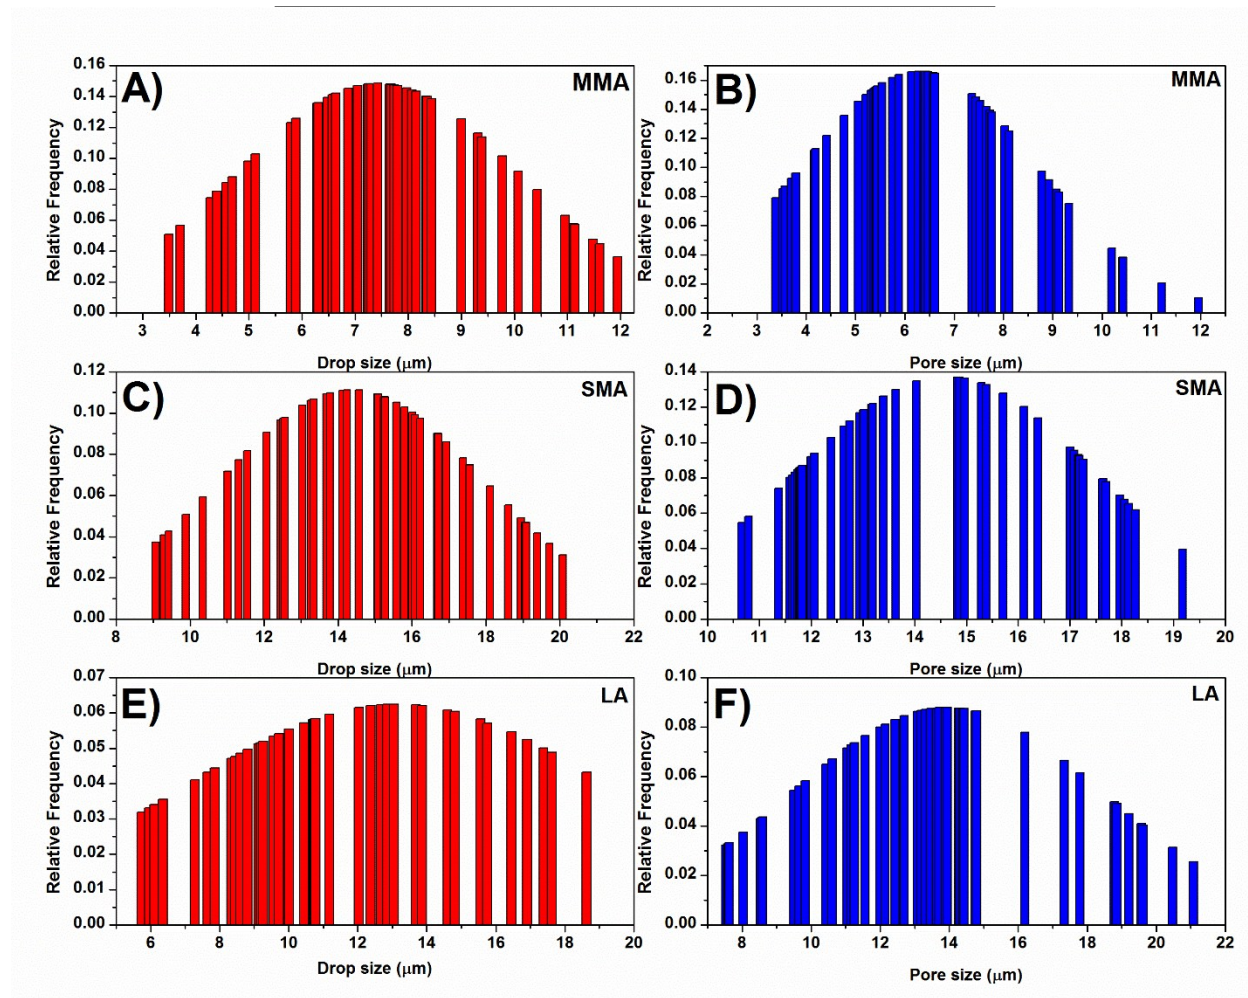

**Figure S9.** HiPE and poly(HIPE) drop size distribution for A) MMA, C) SMA, and E) LA and pore size distribution for B) MMA, D) SMA, and F) LA.

**Table S3.** Structural morphology of HIPEs and Poly(HIPEs)

| PolyHIPE Sample | Specific Surface Area [m <sup>2</sup> g <sup>-1</sup> ] | Drop Radius [μm]      | Pore Radius [μm] | Pore Window [μm] | Deg. of Openness [%] |
|-----------------|---------------------------------------------------------|-----------------------|------------------|------------------|----------------------|
| pMMA10          | nd <sup>a)</sup>                                        | 17.2±6.5              | 16.4±5.0         | 2.4±0.9          | 3.2                  |
| pMMA7           | 1.7                                                     | 7.4±2.7               | 6.3±2.4          | 1.8±0.6          | 23.2                 |
| pLA10           | nd <sup>a)</sup>                                        | 10.5±3.5              | 55.3±30          | 7.0±2.6          | 0.8                  |
| pLA7            | 1.0                                                     | 13.1±6.4              | 14±4.6           | 2.8±1.2          | 10.1                 |
| pSMA10          | 4.3                                                     | 6.9±2.5 <sup>b)</sup> | 5.8±2.0          | 1.4±0.6          | 2.8                  |
| pSMA7           | nd <sup>a)</sup>                                        | 14.4±3.6              | 14.6±2.9         | 0.9±0.3          | 7.1                  |

<sup>a)</sup> not determined. <sup>b)</sup> pSMA10 droplet measurement is representative of pSMA10v.

**Figure S10.** poly(HIPE) pore window size distribution for A) MMA, B) SMA, and C) LA.

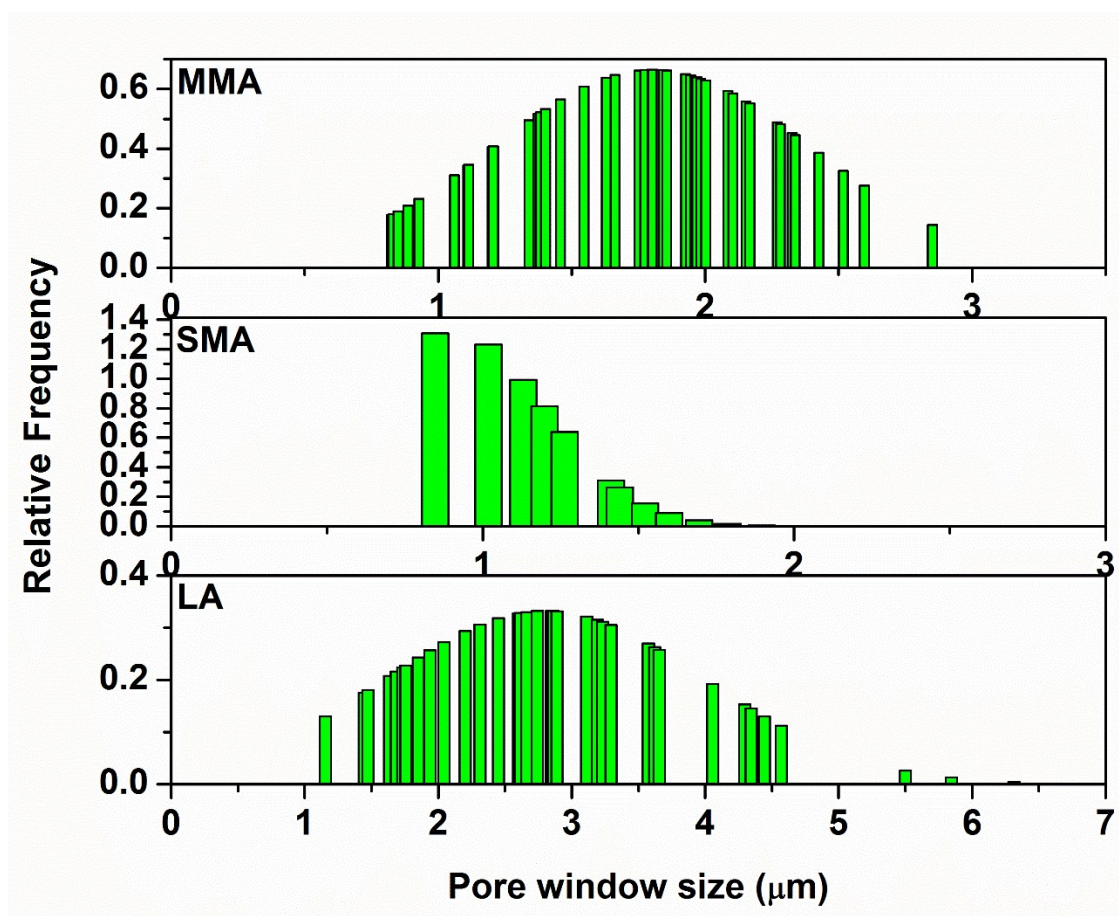

Supplement: c6ra18931h1.pdf [file c6ra18931h1.pdf]
